# Supplementary material for: Antagonistic control of DDK binding to licensed replication origins by Mcm2 and Rad53
Source: PubMed Central journal article supplement (PMC7398698; doi:10.7554/elife.58571), 2020-07-23
Supplement: elife-58571-fig2-figsupp2-data1.pdf [file elife-58571-fig2-figsupp2-data1.pdf]

# Figure 2 - figure supplement 2 - source data 1

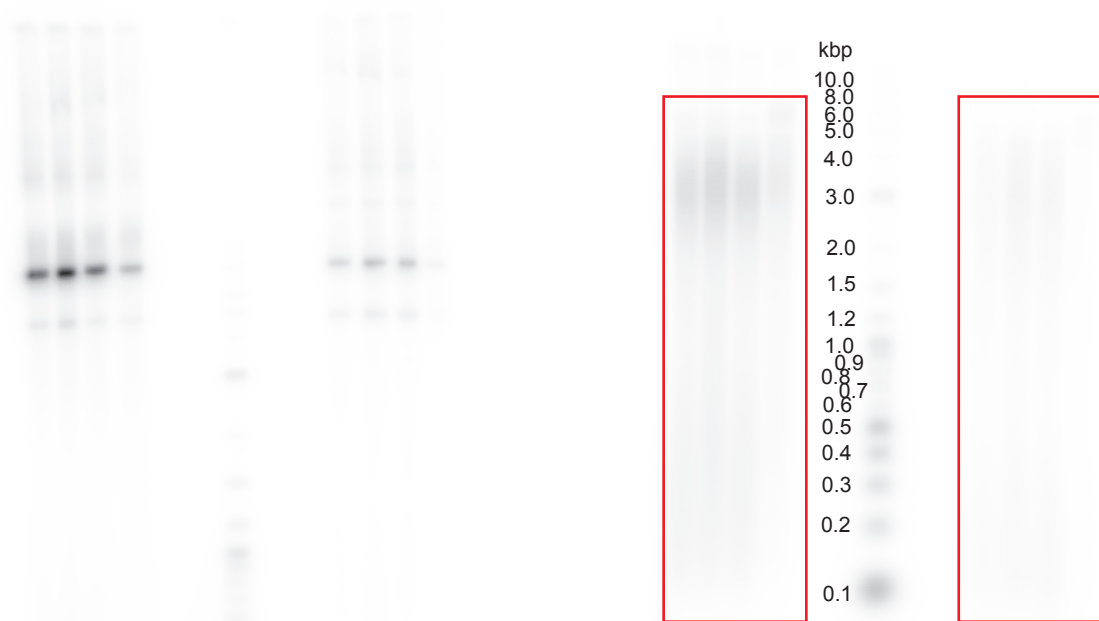

Figure 2 - figure supplement 2
