# Supplementary material for: Antagonistic control of DDK binding to licensed replication origins by Mcm2 and Rad53
Source: PubMed Central journal article supplement (PMC7398698; doi:10.7554/elife.58571), 2020-07-23
Supplement: elife-58571-fig5-figsupp1-data2.pdf [file elife-58571-fig5-figsupp1-data2.pdf]

**Figure 5 - figure supplement 1 - source data 2**

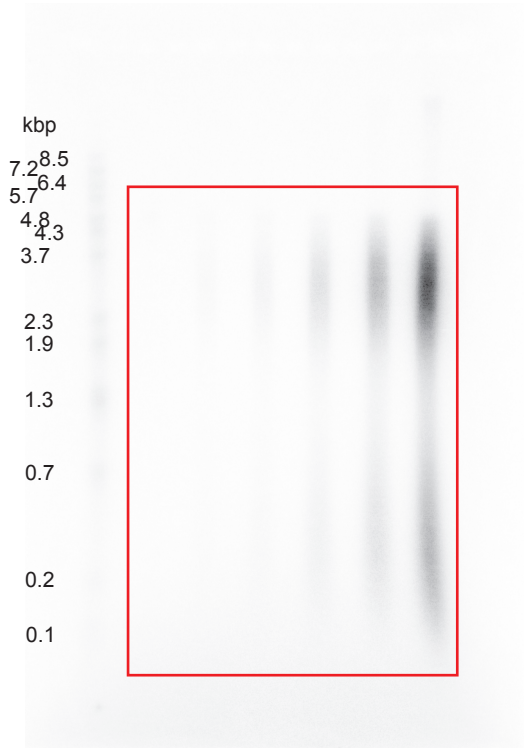

Figure 5 - figure supplement 1B
