# Supplementary material for: Antagonistic control of DDK binding to licensed replication origins by Mcm2 and Rad53
Source: PubMed Central journal article supplement (PMC7398698; doi:10.7554/elife.58571), 2020-07-23
Supplement: elife-58571-fig6-data5.pdf [file elife-58571-fig6-data5.pdf]

# Figure 6 - source data 5

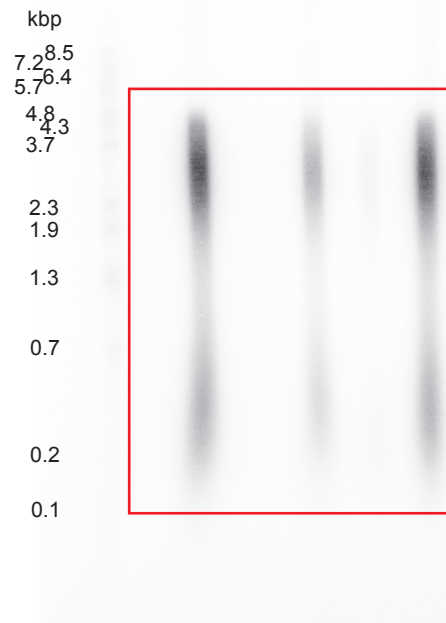

Figure 6B  
Autoradiograph
