# Supplementary material for: Antagonistic control of DDK binding to licensed replication origins by Mcm2 and Rad53
Source: eLife journal article supplement (doi:10.7554/elife.58571), 2020-07-23
Supplement: fig1-data3 [file elife-58571-fig1-data3-v2.pdf]

**Figure 1- source data 3**

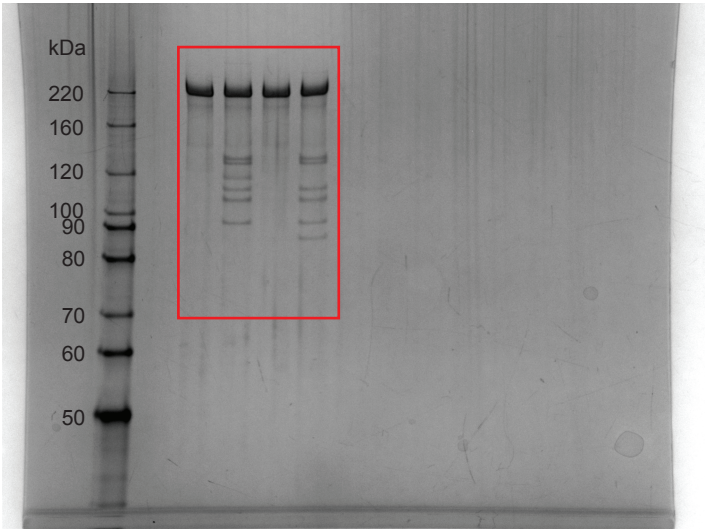

Figure 1 Panel E
