# Supplementary material for: Antagonistic control of DDK binding to licensed replication origins by Mcm2 and Rad53
Source: eLife journal article supplement (doi:10.7554/elife.58571), 2020-07-23
Supplement: fig3-data1 [file elife-58571-fig3-data1-v2.pdf]

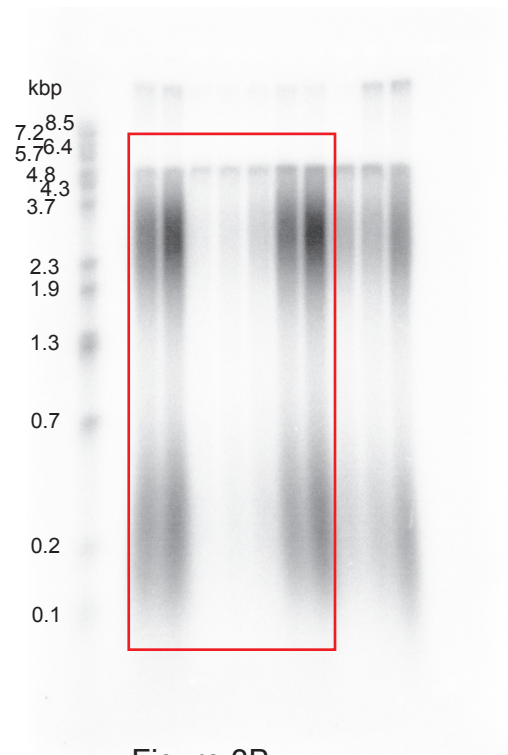

Figure 3B  
Autoradiograph
