# Supplementary material for: Antagonistic control of DDK binding to licensed replication origins by Mcm2 and Rad53
Source: eLife journal article supplement (doi:10.7554/elife.58571), 2020-07-23
Supplement: fig3-data4 [file elife-58571-fig3-data4-v2.pdf]

## Figure 3 - source data 4

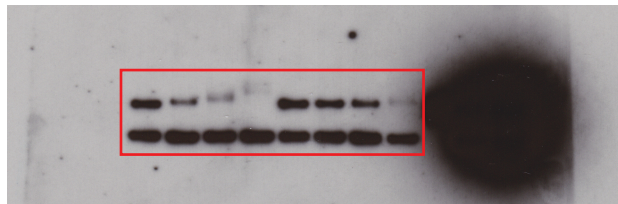

Figure 3C  
Immunoblot: Mcm4, Mcm5
