# Supplementary material for: Antagonistic control of DDK binding to licensed replication origins by Mcm2 and Rad53
Source: eLife journal article supplement (doi:10.7554/elife.58571), 2020-07-23
Supplement: fig4-data17 [file elife-58571-fig4-data17-v2.pdf]

# Figure 4 - source data 17

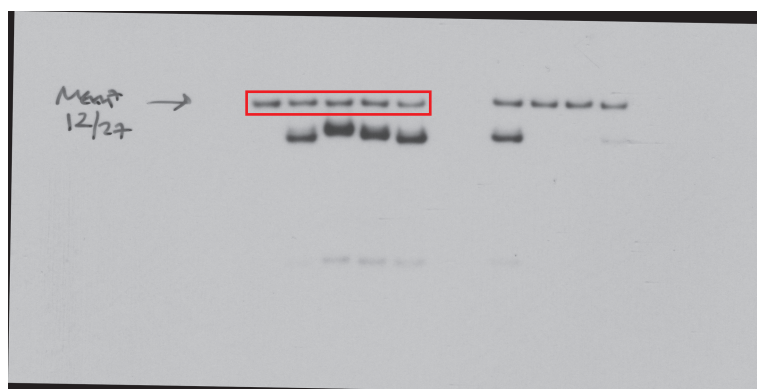

Figure 4F  
Immunoblot: Mcm7
