# Supplementary material for: Antagonistic control of DDK binding to licensed replication origins by Mcm2 and Rad53
Source: eLife journal article supplement (doi:10.7554/elife.58571), 2020-07-23
Supplement: fig6-data4 [file elife-58571-fig6-data4-v2.pdf]

Figure 6 - source data 4

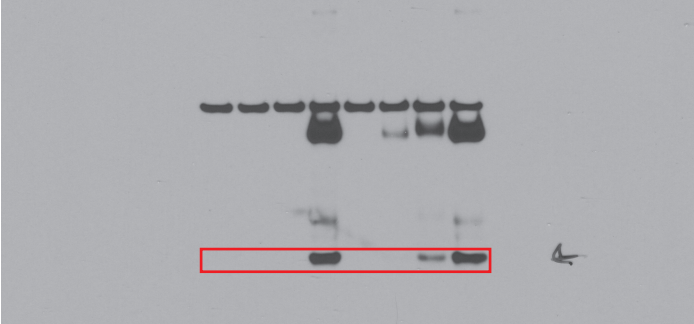

Figure 6A  
Immunoblot: Cdc7
