# Supplementary material for: Antagonistic control of DDK binding to licensed replication origins by Mcm2 and Rad53
Source: eLife journal article supplement (doi:10.7554/elife.58571), 2020-07-23
Supplement: fig7-data9 [file elife-58571-fig7-data9-v2.pdf]

## Figure 7 - source data 9

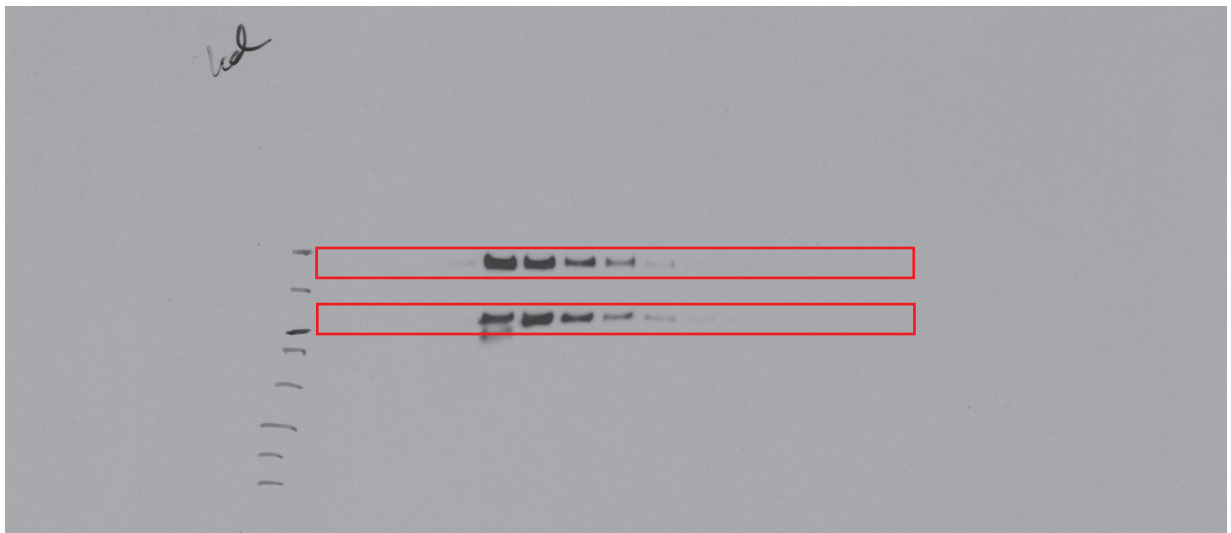

Figure 7B, Rad53-kd + DDK  
Immunoblot: Dbf4, Cdc7
